# Supplementary material
Source: Springer Nature journal article supplement (https://www.springermedizin.de/resource/supplementary/12885_2010_2639_MOESM7_ESM.pdf/9461612)

**A**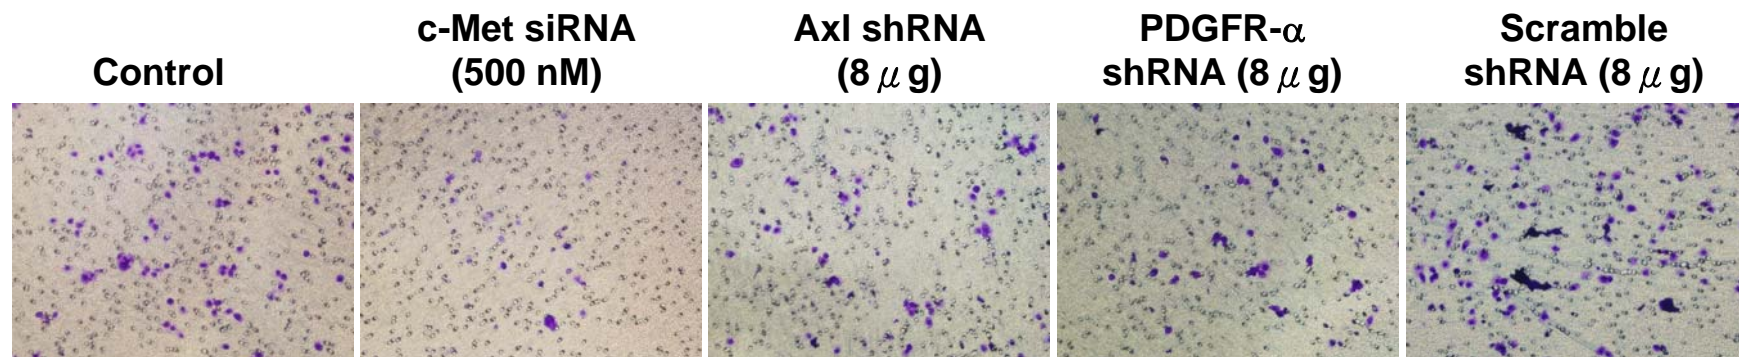**B**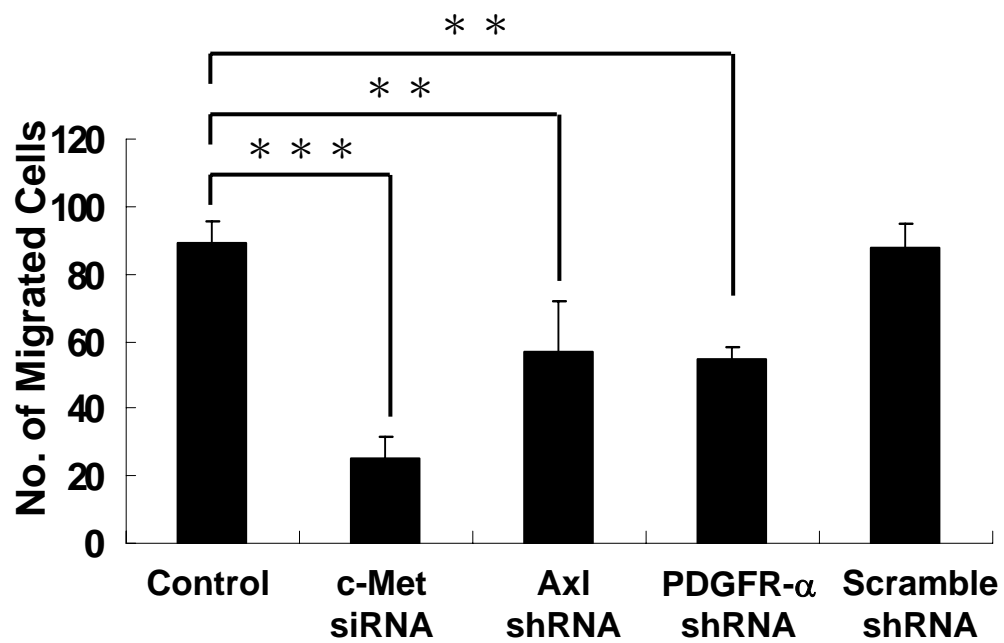**C**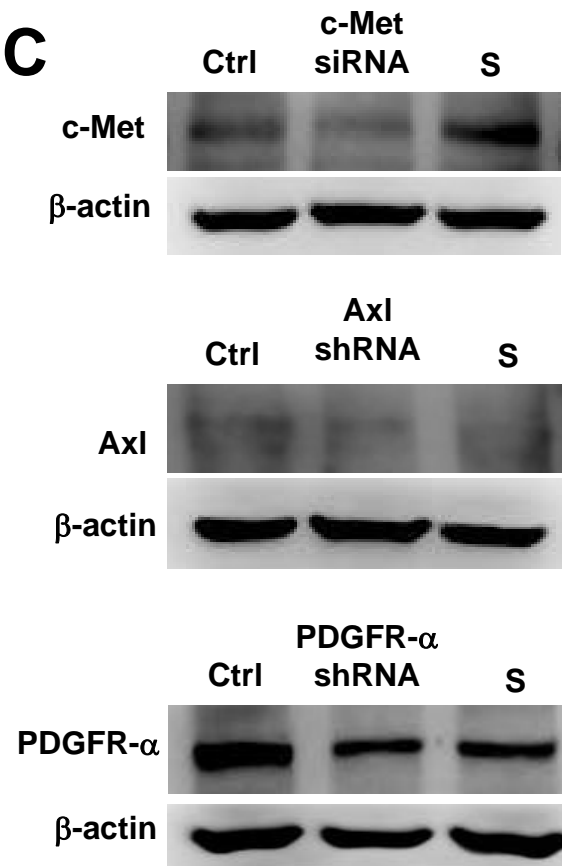

Supplement: MOESM7 [file 9461612]
